# Supplementary material for: Optimizing ChIRP-MS for Comprehensive Profiling of RNA-Protein Interactions in Arabidopsis thaliana: A Telomerase RNA Case Study
Source: MDPI journal article supplement (doi:10.3390/plants13060850), 2024-03-15
Supplement: s1 [file s1]

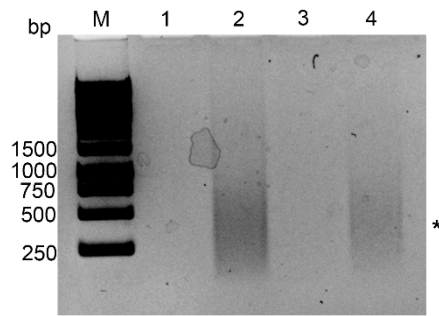

**Figure S1 Comparison of soluble and insoluble fractions of whole cell lysates**

Chromatin fragmentation in 20 ml of homogenate is inconsistent. Chromatin is present in soluble fractions (lane 2 and 4) of the samples but with different yields (marked with an asterisk). Lane 1 and 2 represent insoluble fractions.

M - Gene Ruler 1 kb DNA ladder (Thermo Fisher Scientific).

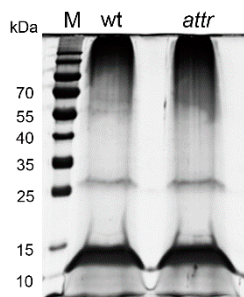

**Figure S2 Protein elution by direct boiling of the beads**

Protein samples were boiled directly on the beads, resolved by SDS-PAGE and silver stained. In both samples, the signal was overlaid by noise, likely originating from streptavidin beads after boiling.

M - PageRuler™ Prestained Protein Ladder (Thermo Fisher Scientific)

**Table S1** List of oligonucleotides used in this study

| <i><b>Primer<br/>name</b></i> | <i><b>sequence</b></i>                  | <i><b>analysis</b></i> |
|-------------------------------|-----------------------------------------|------------------------|
| AtTR Fw                       | TTACTGGGGGTCTTAGGCCG                    | qPCR                   |
| AtTR Rev                      | GGAGGGTAAGGCGAGGAAAC                    | qPCR                   |
| PAC1 Fw                       | TCTCTTTGCAGGATGGGACAAGC                 | qPCR                   |
| PAC1 Rev                      | AGACTGAGCCGCCTGATTGTTTG                 | qPCR                   |
| UBQ Fw                        | AACGGGAAAGACGATTAC                      | qPCR                   |
| UBQ Rev                       | ACAAGATGAAGGGTGGAC                      | qPCR                   |
| VRP 516                       | AA+AT+AT+T+TG+G+G+GG/3BioTEG/           | antisense; pull-down   |
| VRP 517                       | A+C+C+TA+CG+A+AC+C/3BioTEG/             | antisense; pull-down   |
| VRP 518                       | CC+TG+G+TC+TA+CT+TT+TT/3BioTEG/         | antisense; pull-down   |
| VRP 519                       | TT+TT+CA+TT+ATT+TT+CGGGGG/3BioTEG/      | antisense; pull-down   |
| Probe1                        | C+C+C+C+CAA+ATAT+TT/3BioTEG/            | sense; pull-down       |
| Probe2                        | G+GT+T+CG+T+AG+GT/3BioTEG/              | sense; pull-down       |
| Probe3                        | AA+AA+A+GTA+G+AC+CA+GG/3BioTEG/         | sense; pull-down       |
| Probe4                        | CCCCC+G+A+A+AAAT+A+AT+G+A+A+AA/3BioTEG/ | sense; pull-down       |

+ = Affinity Plus base

/3BioTEG/ = 3'-biotin-triethyleneglycole spacer
